# Supplementary material
Source: PubMed Central journal article supplement (PMC9090948)
Supplement: NIHMS1760100-supplement-1760100_Sup_file-1.pdf [file NIHMS1760100-supplement-1760100_Sup_file-1.pdf]

**Title:** “Thandi should feel embarrassed”: Describing the validity and reliability of a tool to measure depression-related stigma among patients with depressive symptoms in Malawi

**Authors:** J.M. Dussault<sup>1</sup>, C. Zimba<sup>2</sup>, J. Malava<sup>3</sup>, H. Akello<sup>2</sup>, M.A. Stockton<sup>4,5</sup>, M. Udedi<sup>6</sup>, B.N. Gaynes<sup>1,7</sup>, M.C. Hosseinipour<sup>2,8</sup>, B.W. Pence<sup>1</sup>, J. Masiye<sup>6</sup>

<sup>1</sup>UNC Gillings School of Global Public Health, Dept of Epidemiology, Chapel Hill, USA; <sup>2</sup>UNC Project - Malawi, Lilongwe, Malawi; <sup>3</sup>Malawi Epidemiology and Intervention Research Unit, Karonga, Malawi; <sup>4</sup>Columbia University Vagelos College of Physicians and Surgeons, Dept of Psychiatry, New York, USA; <sup>5</sup>New York State Psychiatric Institute, New York, USA; <sup>6</sup>Ministry of Health Malawi, NCDs & Mental Health Unit, Lilongwe, Malawi; <sup>7</sup>UNC School of Medicine, Dept of Psychiatry, Chapel Hill, USA; <sup>8</sup>UNC School of Medicine, Division of Infectious Disease, Chapel Hill, USA

**Corresponding Author:** Josée Dussault, [josee.dussault@unc.edu](mailto:josee.dussault@unc.edu)

**Supplementary Table 1. Exploratory factor analysis results excluding stigma item #4.<sup>a</sup>**

| Questionnaire Items                                                                                                                                                                                      | Factor 1:<br>Negative<br>Affect | Factor 2:<br>Treatment<br>Carryover | Factor 3:<br>Disclosure<br>Carryover | Alpha       |
|----------------------------------------------------------------------------------------------------------------------------------------------------------------------------------------------------------|---------------------------------|-------------------------------------|--------------------------------------|-------------|
| <i>Overall stigma scale</i>                                                                                                                                                                              |                                 |                                     |                                      | <i>0.76</i> |
| <i>Negative affect subscale</i>                                                                                                                                                                          |                                 |                                     |                                      | <i>0.68</i> |
| 1. Being around Thandi would make me feel uncomfortable.                                                                                                                                                 | <b>0.58</b>                     | -0.02                               | -0.08                                |             |
| 2. Thandi should feel embarrassed about her situation.                                                                                                                                                   | <b>0.50</b>                     | -0.16                               | 0.21                                 |             |
| 6. Being around someone diagnosed with depression like Thandi would make me feel uncomfortable.                                                                                                          | <b>0.65</b>                     | 0.12                                | -0.10                                |             |
| 7. Thandi should feel embarrassed about her diagnosis of depression.                                                                                                                                     | <b>0.53</b>                     | 0.10                                | 0.12                                 |             |
| <i>Disclosure carryover subscale</i>                                                                                                                                                                     |                                 |                                     |                                      | <i>0.74</i> |
| 3. Members of Thandi’s family would be better off if Thandi’s situation was kept secret.                                                                                                                 | -0.07                           | 0.02                                | <b>0.69</b>                          |             |
| 8. Members of Thandi’s family would be better off if her diagnosis of depression was kept secret.                                                                                                        | 0.05                            | 0.05                                | <b>0.67</b>                          |             |
| <i>Treatment carryover subscale</i>                                                                                                                                                                      |                                 |                                     |                                      | <i>0.87</i> |
| 9. If Thandi were going to a clinic regularly to speak with a trained therapist about her problems to help treat her depression, and people found out she was going, she would lose some of her friends. | 0.04                            | <b>0.81</b>                         | 0.04                                 |             |
| 10. If Thandi were taking medication to help treat her depression, and people found out she was taking medication, she would lose some of her friends.                                                   | 0.01                            | <b>0.81</b>                         | 0.01                                 |             |

a. This EFA used the principal-factors method and an oblique (promax) rotation, just as Table 2 in the main text.
