# Supplementary material
Source: PubMed Central journal article supplement (PMC9090948)

**Title:** “Thandi should feel embarrassed”: Describing the validity and reliability of a tool to measure depression-related stigma among patients with depressive symptoms in Malawi

**Authors:** J.M. Dussault<sup>1</sup>, C. Zimba<sup>2</sup>, J. Malava<sup>3</sup>, H. Akello<sup>2</sup>, M.A. Stockton<sup>4,5</sup>, M. Udedi<sup>6</sup>, B.N. Gaynes<sup>1,7</sup>, M.C. Hosseinipour<sup>2,8</sup>, B.W. Pence<sup>1</sup>, J. Masiye<sup>6</sup>

<sup>1</sup>UNC Gillings School of Global Public Health, Dept of Epidemiology, Chapel Hill, USA; <sup>2</sup>UNC Project - Malawi, Lilongwe, Malawi; <sup>3</sup>Malawi Epidemiology and Intervention Research Unit, Karonga, Malawi; <sup>4</sup>Columbia University Vagelos College of Physicians and Surgeons, Dept of Psychiatry, New York, USA; <sup>5</sup>New York State Psychiatric Institute, New York, USA; <sup>6</sup>Ministry of Health Malawi, NCDs & Mental Health Unit, Lilongwe, Malawi; <sup>7</sup>UNC School of Medicine, Dept of Psychiatry, Chapel Hill, USA; <sup>8</sup>UNC School of Medicine, Division of Infectious Disease, Chapel Hill, USA

**Corresponding Author:** Josée Dussault, [josee.dussault@unc.edu](mailto:josee.dussault@unc.edu)

**Supplementary Figure 1. What Caused Thandi’s Situation?**

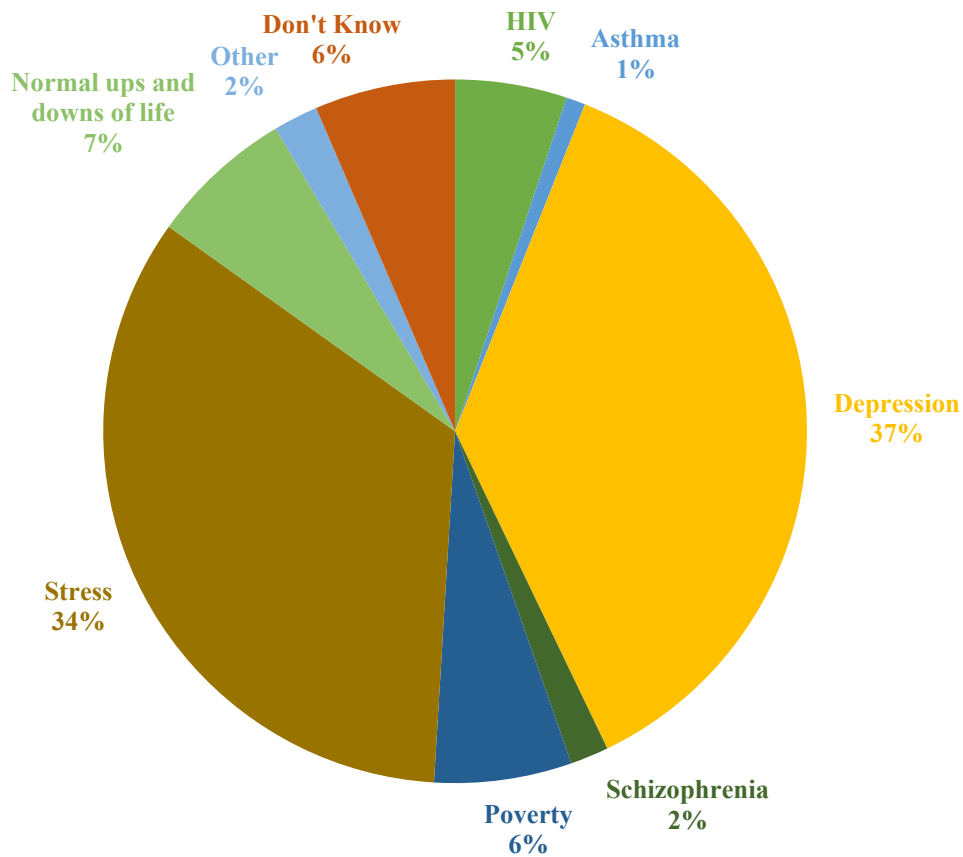

Supplement: NIHMS1760100-supplement-1760100_Sup_file-2.pdf [file NIHMS1760100-supplement-1760100_Sup_file-2.pdf]
